# Supplementary material
Source: publisher figshare collection journal article supplement (https://acs.figshare.com/ndownloader/files/5090914)

## Supporting Information

### **Aromatic Core modified Twisted Heptaphyrins [1.1.1.1.1.0]: Syntheses and Structural Characterization**

**Harapriya Rath, Jeyaraman Sankar, Viswanathan PrabhuRaja, Tavarekere K.  
Chandrashekar<sup>†</sup>, Bhawani S. Joshi.**

|           |                                                          |
|-----------|----------------------------------------------------------|
| <b>S2</b> | <b>General synthetic procedure for<br/>macrocycle 6.</b> |
| <b>S3</b> | <b>FAB – Mass Spectra of 6 and 7</b>                     |
| <b>S4</b> | <b>UV-vis Spectra of 7</b>                               |

**Synthetic procedure for macrocycle (6):**

Modified tetrapyrane **4** (0.6 g, 1.07 mmol) and modified tripyrrane **5** (0.51g, 1.07mmol) were reacted with pentafluorobenzaldehyde (0.26 mL, 2.14 mmol) in dry dichloromethane (250 mL) and stirred under a nitrogen atmosphere in the absence of light for 15 min. *p*-Tolylsulphonic acid (0.1017 g, 0.53 mmol) was added and stirring continued for 90 min. The reaction mixture was exposed to air, and chloranil (0.3 g, 1.25 mmol) was added; the reaction mixture was refluxed for 90 min on a preheated oil bath. The solvent was removed under reduced pressure. Upon purification by column chromatography with alumina (basic, grade-III), a pink band eluted with dichloromethane/petroleum ether (2:3), which on solvent evaporation afforded **6** as a dark green solid (0.140 g, 10 %).

**FAB-MASS Spectrum of 6:**

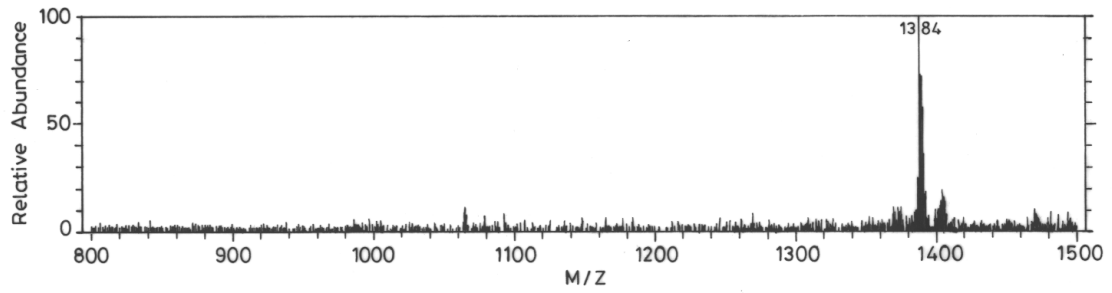

**FAB-MASS Spectrum of 7:**

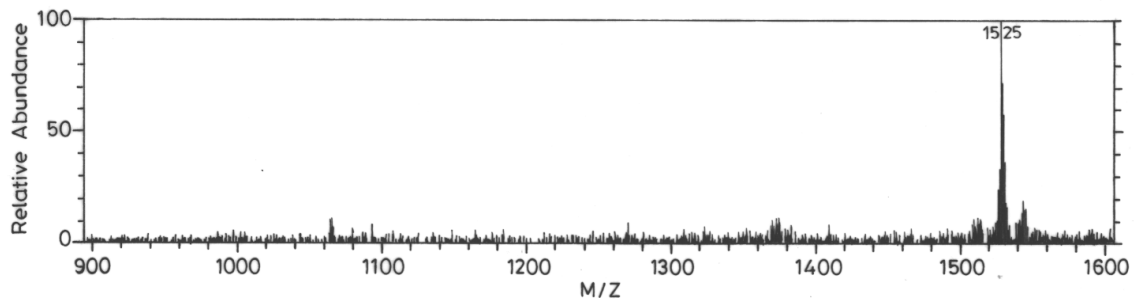

### UV-vis Spectrum of 7:

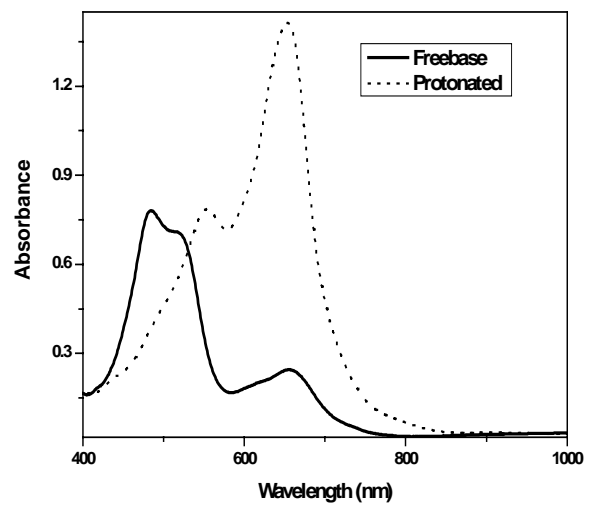

Supplement: Supplementary file 1 [file 5090914]
